# Supplementary material for: Acetophenone derivatives: novel and potent small molecule inhibitors of monoamine oxidase B
Source: Royal Society of Chemistry journal article supplement (doi:10.1039/c5md00357a), 2015-01-01
Supplement: c5md00357a1.pdf [file c5md00357a1.pdf]

**Acetophenone derivatives: novel and potent small molecule inhibitors of  
Monoamine Oxidase B**

Zhi-Min Wang, Xue-Mei Li, Wei Xu, Fan Li, Jin Wang, Ling-Yi Kong \* and Xiao-  
Bing Wang \*

*State Key Laboratory of Natural Medicines, Department of Natural Medicinal  
Chemistry, China Pharmaceutical University, 24 Tong Jia Xiang, Nanjing 210009,  
People's Republic of China*

\*Corresponding Authors

Tel/Fax: +86-25-8327-1405.

E-mail: [cpu\\_lykong@126.com](mailto:cpu_lykong@126.com); [xbwang@cpu.edu.cn](mailto:xbwang@cpu.edu.cn).

**Table S1.** Physical properties of compounds **1a-1u** and **2a-2m**.

| Compounds | MW <sup>a</sup> | C log P <sup>a</sup> | HBA <sup>a</sup> | HBD <sup>a</sup> | PAS <sup>a</sup> | Log BB <sup>a</sup> |
|-----------|-----------------|----------------------|------------------|------------------|------------------|---------------------|
| <b>1a</b> | 226.27          | 3.569                | 2                | 0                | 26.3             | 0.292248            |
| <b>1b</b> | 240.3           | 4.018                | 2                | 0                | 26.3             | 0.360496            |
| <b>1c</b> | 240.3           | 4.068                | 2                | 0                | 26.3             | 0.368096            |
| <b>1d</b> | 240.3           | 4.068                | 2                | 0                | 26.3             | 0.368096            |
| <b>1e</b> | 271.27          | 3.232                | 4                | 0                | 78.11            | -0.525764           |
| <b>1f</b> | 271.27          | 3.312                | 4                | 0                | 78.11            | -0.513604           |
| <b>1g</b> | 271.27          | 3.312                | 4                | 0                | 78.11            | -0.513604           |
| <b>1h</b> | 244.26          | 3.712                | 3                | 0                | 26.3             | 0.313984            |
| <b>1i</b> | 244.26          | 3.712                | 3                | 0                | 26.3             | 0.313984            |
| <b>1j</b> | 244.26          | 3.712                | 3                | 0                | 26.3             | 0.313984            |
| <b>1k</b> | 262.25          | 3.855                | 4                | 0                | 26.3             | 0.33572             |
| <b>1l</b> | 262.25          | 3.785                | 4                | 0                | 26.3             | 0.32508             |
| <b>1m</b> | 280.24          | 3.858                | 5                | 0                | 26.3             | 0.336176            |
| <b>1n</b> | 260.72          | 4.282                | 3                | 0                | 26.3             | 0.400624            |
| <b>1o</b> | 260.72          | 4.282                | 3                | 0                | 26.3             | 0.400624            |
| <b>1p</b> | 260.72          | 4.282                | 3                | 0                | 26.3             | 0.400624            |
| <b>1q</b> | 294.27          | 4.452                | 5                | 0                | 26.3             | 0.426464            |
| <b>1r</b> | 294.27          | 4.452                | 5                | 0                | 26.3             | 0.426464            |
| <b>1s</b> | 294.27          | 4.452                | 5                | 0                | 26.3             | 0.426464            |
| <b>1t</b> | 305.17          | 4.432                | 3                | 0                | 26.3             | 0.423424            |
| <b>1u</b> | 305.17          | 4.432                | 3                | 0                | 26.3             | 0.423424            |
| <b>2a</b> | 226.27          | 3.569                | 2                | 0                | 26.3             | 0.292248            |
| <b>2b</b> | 244.26          | 3.712                | 3                | 0                | 26.3             | 0.313984            |
| <b>2c</b> | 244.26          | 3.712                | 3                | 0                | 26.3             | 0.313984            |
| <b>2d</b> | 260.72          | 4.282                | 3                | 0                | 26.3             | 0.400624            |
| <b>2e</b> | 260.72          | 4.282                | 3                | 0                | 26.3             | 0.400624            |
| <b>2f</b> | 305.17          | 4.432                | 3                | 0                | 26.3             | 0.423424            |
| <b>2g</b> | 305.17          | 4.432                | 3                | 0                | 26.3             | 0.423424            |
| <b>2h</b> | 240.3           | 4.068                | 2                | 0                | 26.3             | 0.368096            |
| <b>2i</b> | 240.3           | 4.068                | 2                | 0                | 26.3             | 0.368096            |
| <b>2j</b> | 294.27          | 4.452                | 5                | 0                | 26.3             | 0.426464            |
| <b>2k</b> | 294.27          | 4.452                | 5                | 0                | 26.3             | 0.426464            |
| <b>2l</b> | 271.27          | 3.312                | 4                | 0                | 78.11            | -0.513604           |
| <b>2m</b> | 271.27          | 3.312                | 4                | 0                | 78.11            | -0.513604           |
| Rules     | ≤450            | ≤5.0                 | ≤10              | ≤5               | ≤90              | ≥-1.0               |

<sup>a</sup> MW: molecular weight; C log P: calculated logarithm of the octanol-water partition coefficient; HBA: hydrogen-bond acceptor atoms; HBD: hydrogen-bond donor atoms; PSA: polar surface area; log BB = 0.0148 × PSA + 0.152 × C log P + 0.130.

**Figure S1.** Docking pictures of compounds **1j** and **2e** with MAO-A.

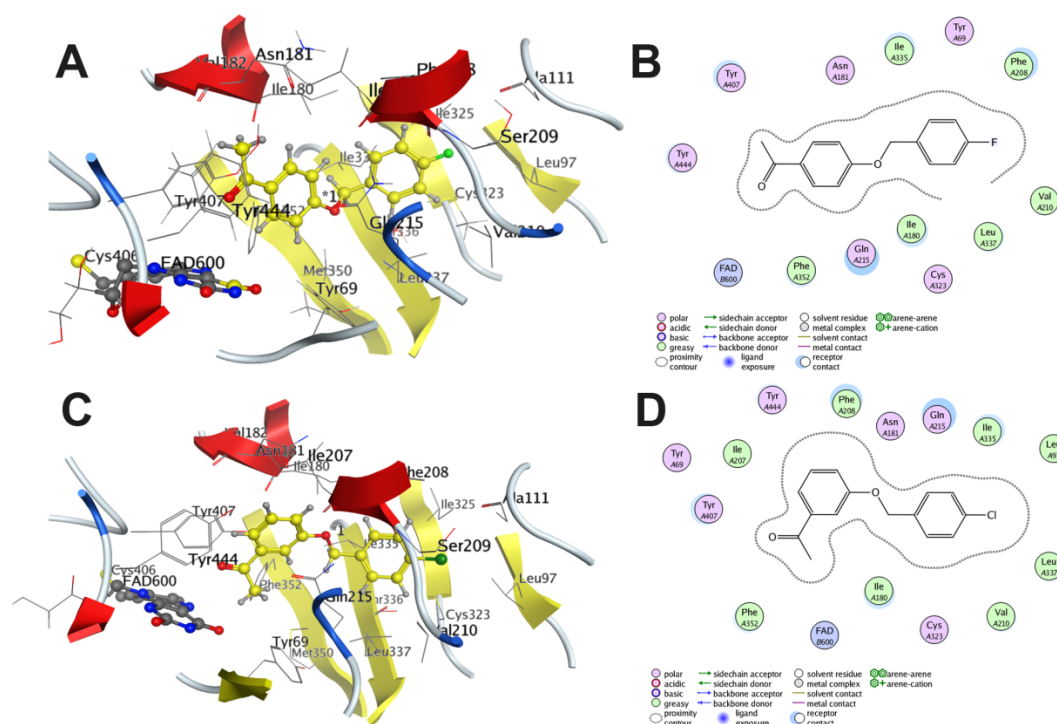

(A) 3D docking model of compound **1j** with MAO-A. Atom colors: yellow-carbon atoms of **1j**, gray-carbon atoms of residues of MAO-A, dark blue-nitrogen atoms, red-oxygen atoms. The dashed lines represent the interactions between the protein and the ligand. (B) 2D schematic diagram of docking model of compound **1j** with MAO-A. (C) 3D docking model of compound **2e** with MAO-A. (D) 2D schematic diagram of docking model of compound **2e** with MAO-A. The figure was prepared using the ligand interactions application in MOE.

**Figure S2.** The representative  $^1\text{H}$  NMR,  $^{13}\text{C}$  NMR and HRMS (ESI) spectrums of compounds **1a**, **1j**, **2a** and **2e**.

**$^1\text{H}$  NMR spectrum of compound **1a** in DMSO**

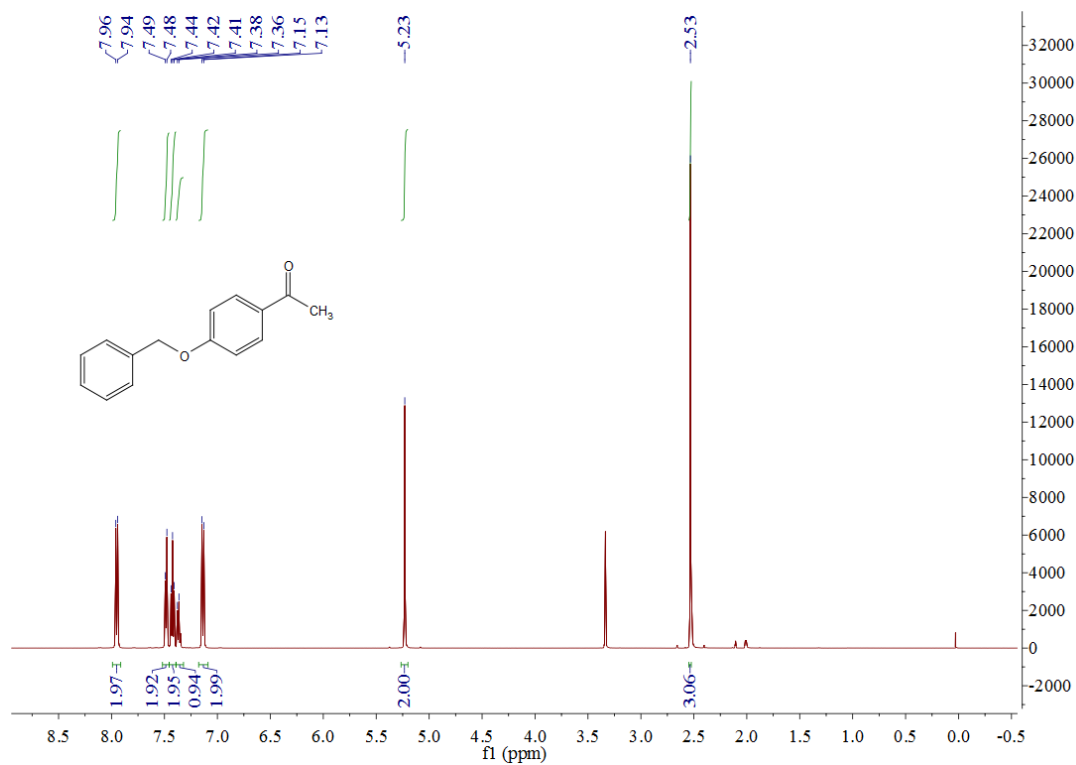

**$^{13}\text{C}$  NMR spectrum of compound **1a** in DMSO**

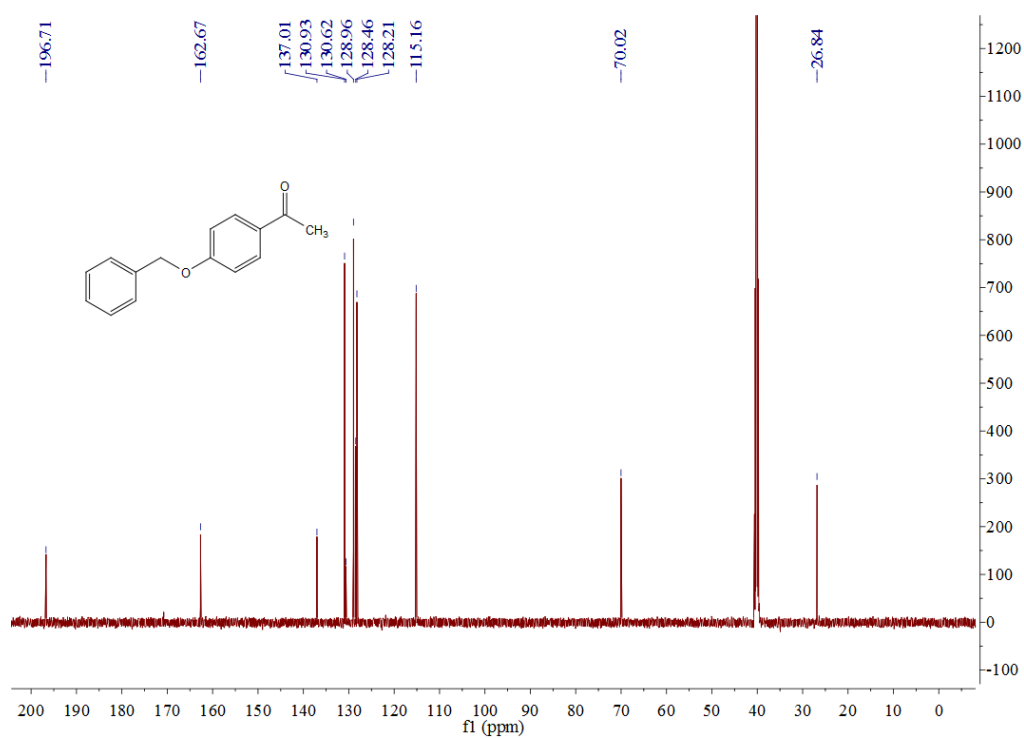

### HRMS (ESI) spectrum of compound 1a

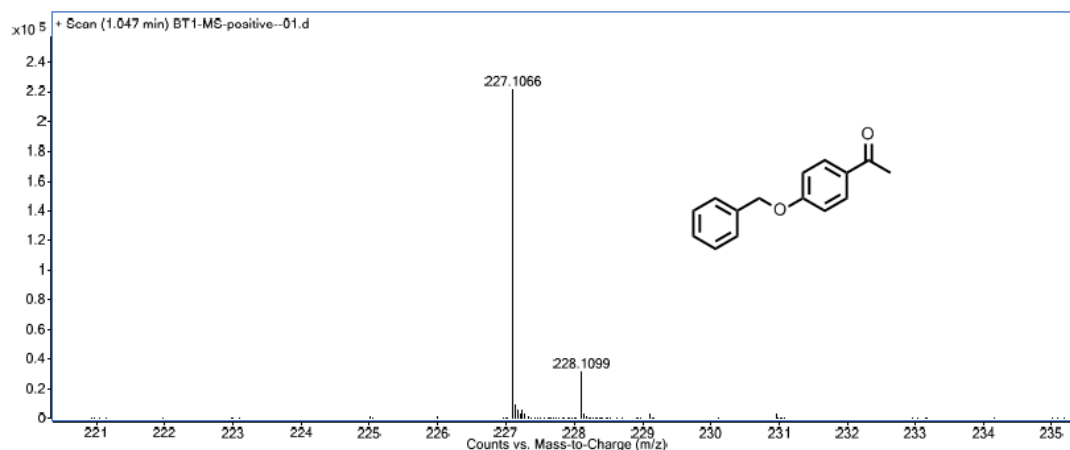

### Elemental Composition Calculator

|                                                |                                                  |                       |               |                  |                    |
|------------------------------------------------|--------------------------------------------------|-----------------------|---------------|------------------|--------------------|
| <b>Target m/z:</b>                             | 227.1066                                         | <b>Result type:</b>   | Positive ions | <b>Species:</b>  | [M+H] <sup>+</sup> |
| <b>Elements:</b>                               | C (0-80); H (0-120); O (0-30); N(0-10); Na (0-5) |                       |               |                  |                    |
| <b>Ion Formula</b>                             |                                                  | <b>Calculated m/z</b> |               | <b>PPM Error</b> |                    |
| C <sub>15</sub> H <sub>15</sub> O <sub>2</sub> |                                                  | 227.1067              |               | 0.41             |                    |

### <sup>1</sup>H NMR spectrum of compound 1j in DMSO

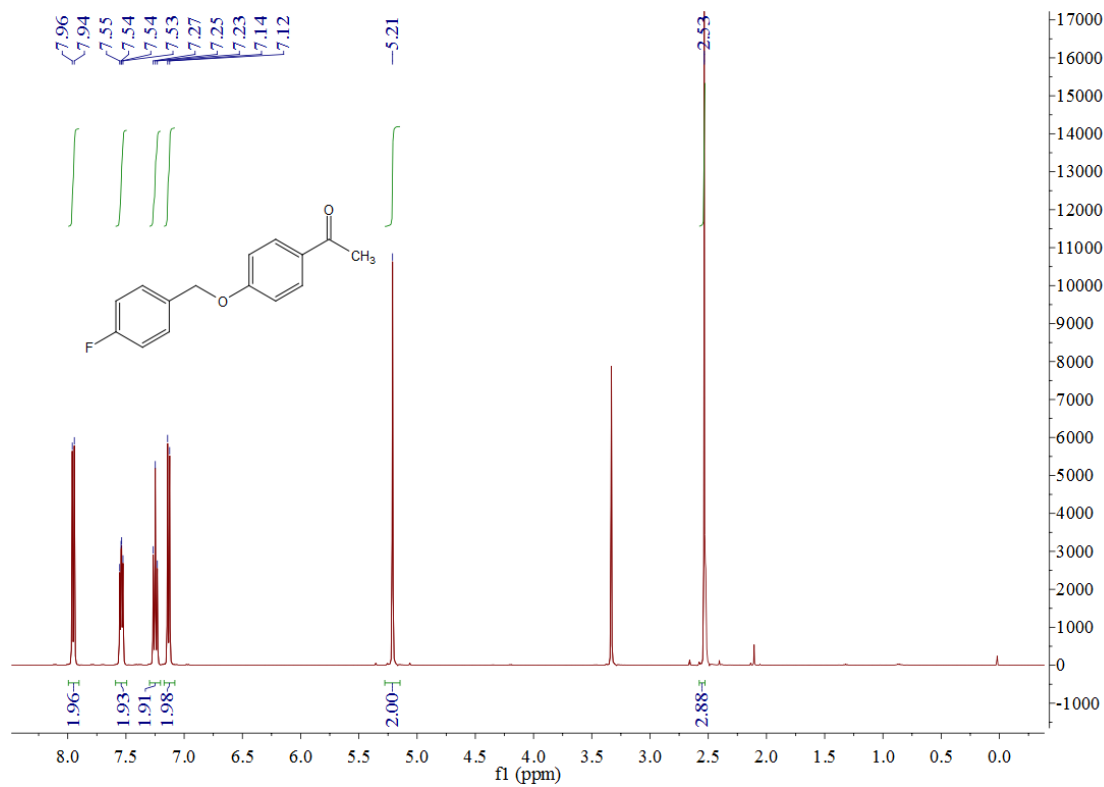

### <sup>13</sup>C NMR spectrum of compound 1j in DMSO

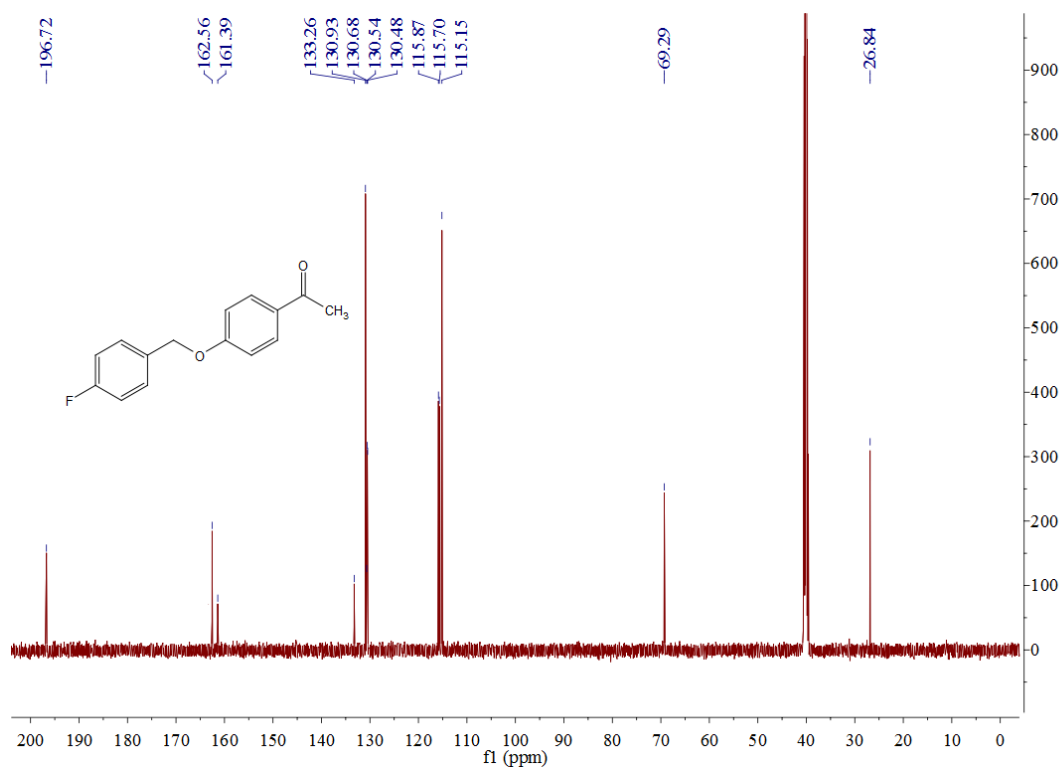

### HRMS (ESI) spectrum of compound 1j

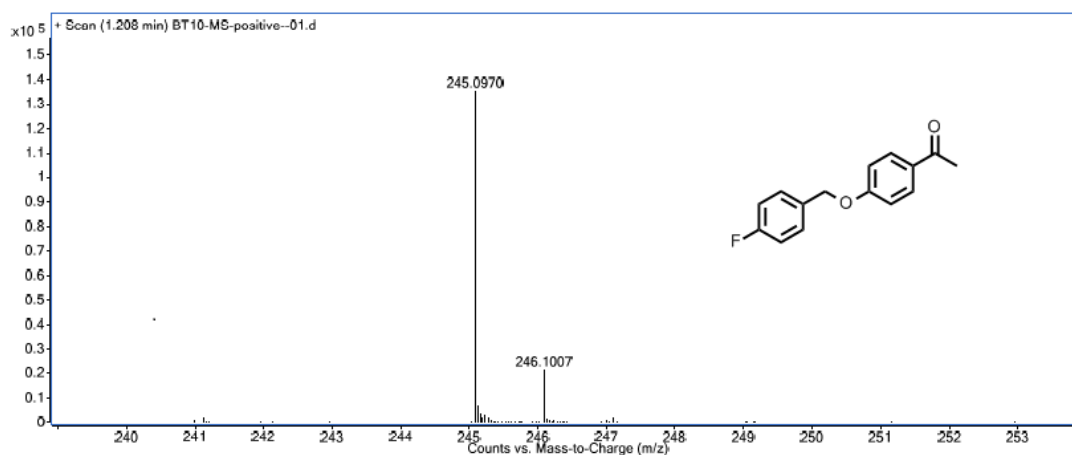

### Elemental Composition Calculator

| Target m/z:        | 245.0970                                        | Result type:     | Positive ions | Species: | [M+H] <sup>+</sup> |
|--------------------|-------------------------------------------------|------------------|---------------|----------|--------------------|
| <b>Elements:</b>   | C (0-80); H (0-120); O (0-30); N(0-10); F (0-5) |                  |               |          |                    |
| <b>Ion Formula</b> | <b>Calculated m/z</b>                           | <b>PPM Error</b> |               |          |                    |
| C15H14FO2          | 245.0972                                        | 0.83             |               |          |                    |

### <sup>1</sup>H NMR spectrum of compound 2a in DMSO

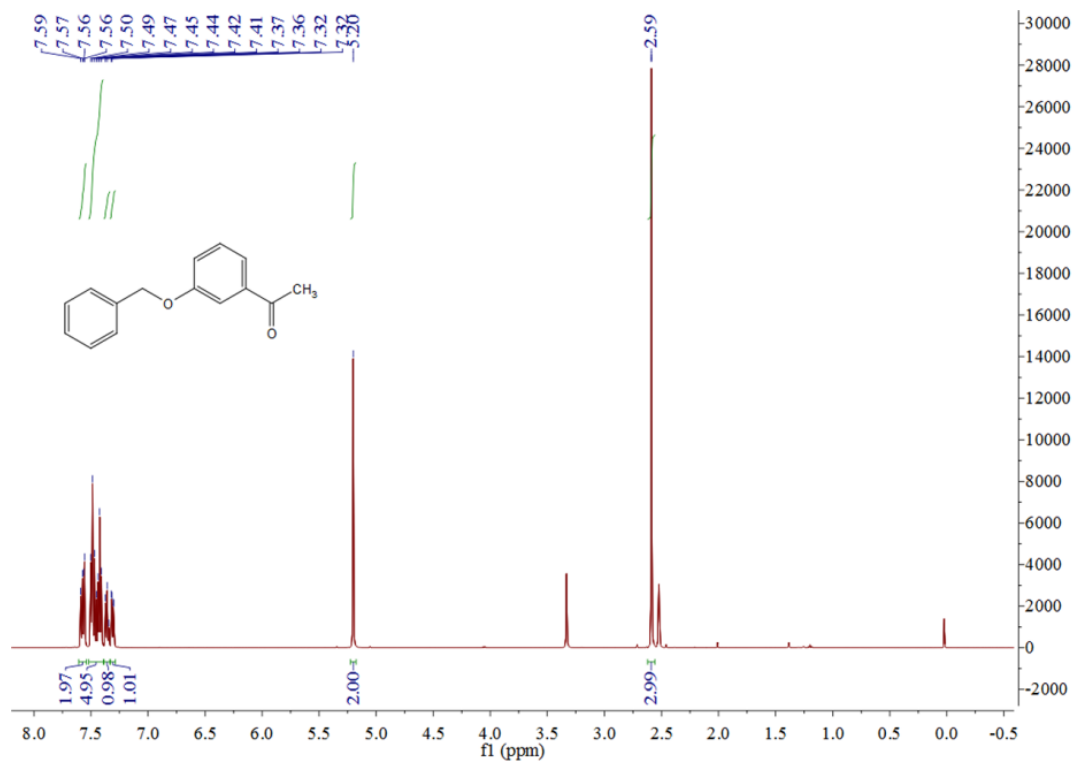

### <sup>13</sup>C NMR spectrum of compound 2a in DMSO

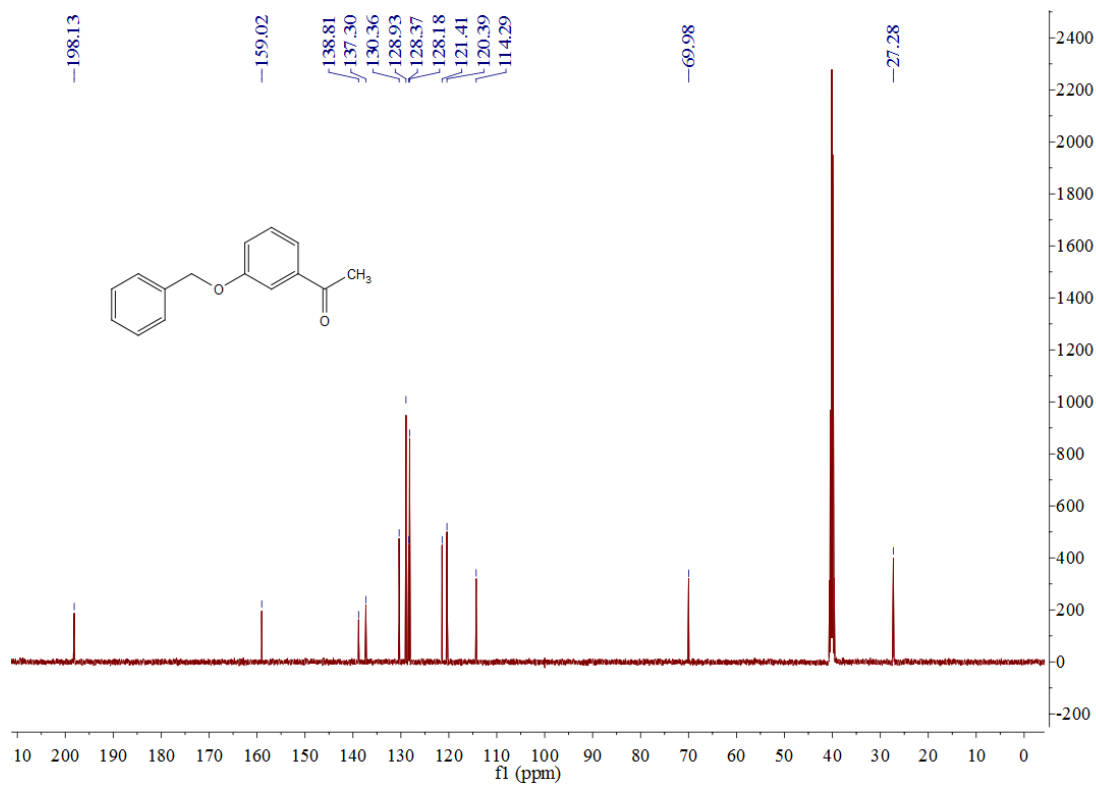

## HRMS (ESI) spectrum of compound 2a

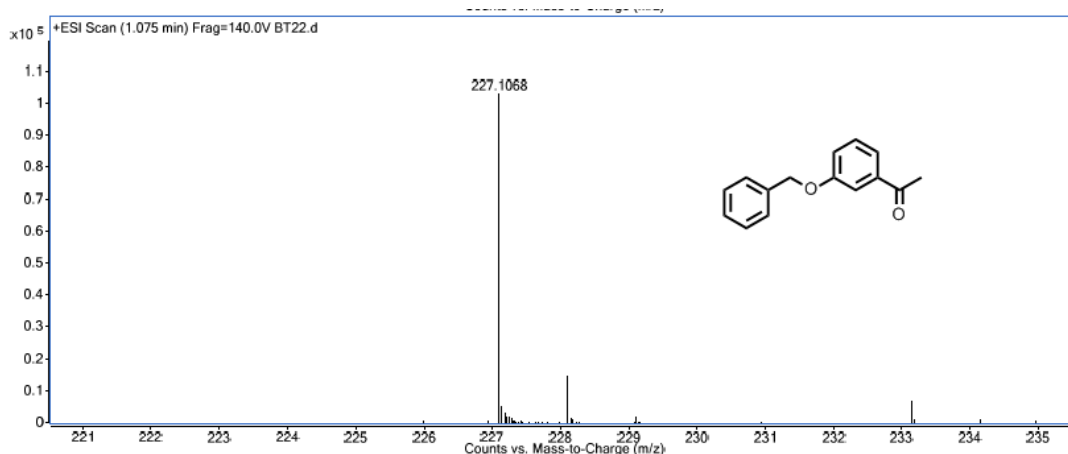

## Elemental Composition Calculator

|                                                |                                                  |                     |                  |                 |                    |
|------------------------------------------------|--------------------------------------------------|---------------------|------------------|-----------------|--------------------|
| <b>Target m/z:</b>                             | 227.1068                                         | <b>Result type:</b> | Positive ions    | <b>Species:</b> | [M+H] <sup>+</sup> |
| <b>Elements:</b>                               | C (0-80); H (0-120); O (0-30); N(0-10); Cl (0-5) |                     |                  |                 |                    |
| <b>Ion Formula</b>                             | <b>Calculated m/z</b>                            |                     | <b>PPM Error</b> |                 |                    |
| C <sub>15</sub> H <sub>15</sub> O <sub>2</sub> | 227.1067                                         |                     | -0.67            |                 |                    |

## <sup>1</sup>H NMR spectrum of compound 2e in DMSO

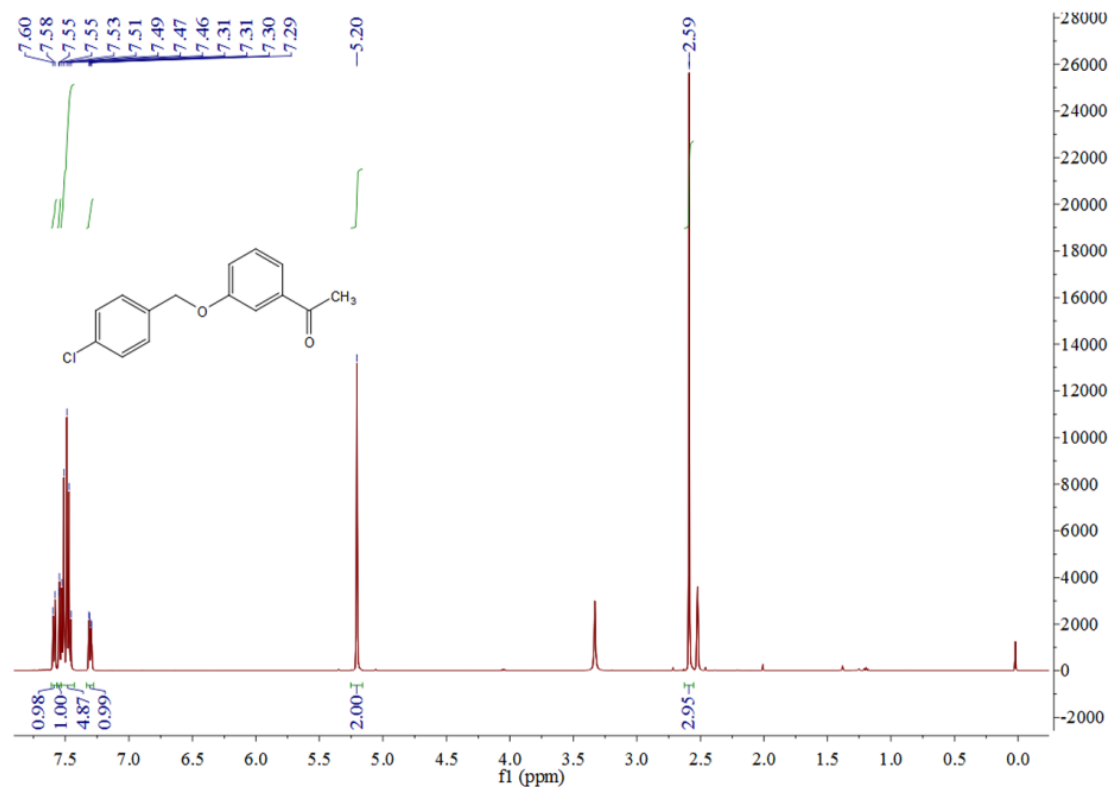



### <sup>13</sup>C NMR spectrum of compound 2e in DMSO

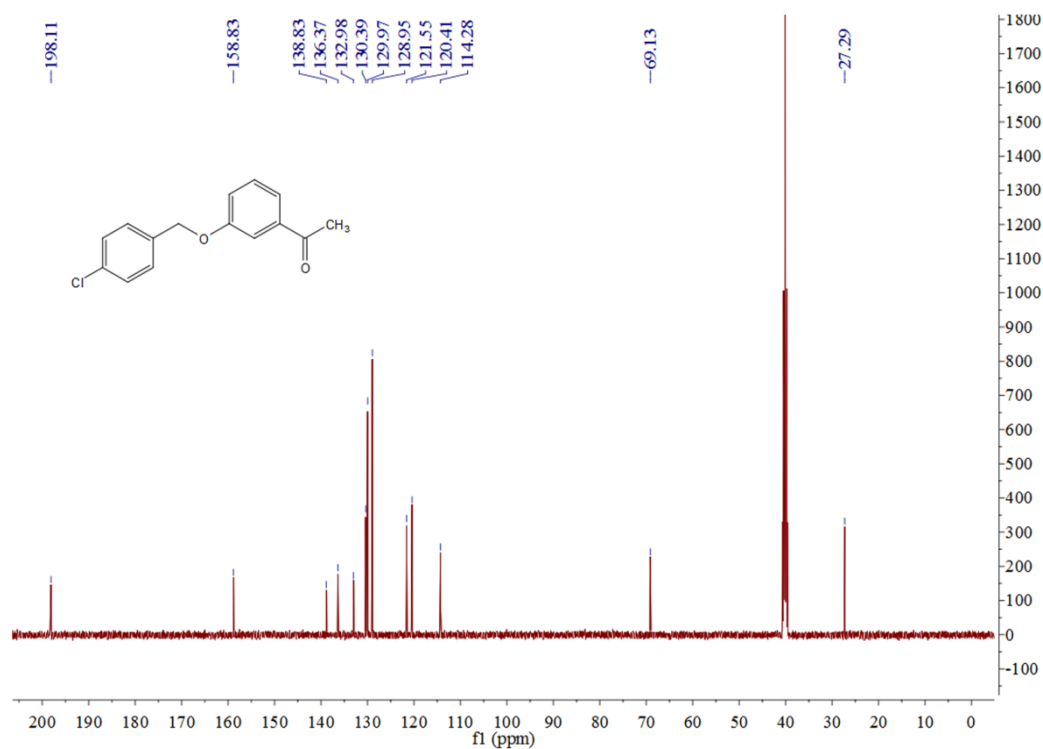

### HRMS (ESI) spectrum of compound 2e

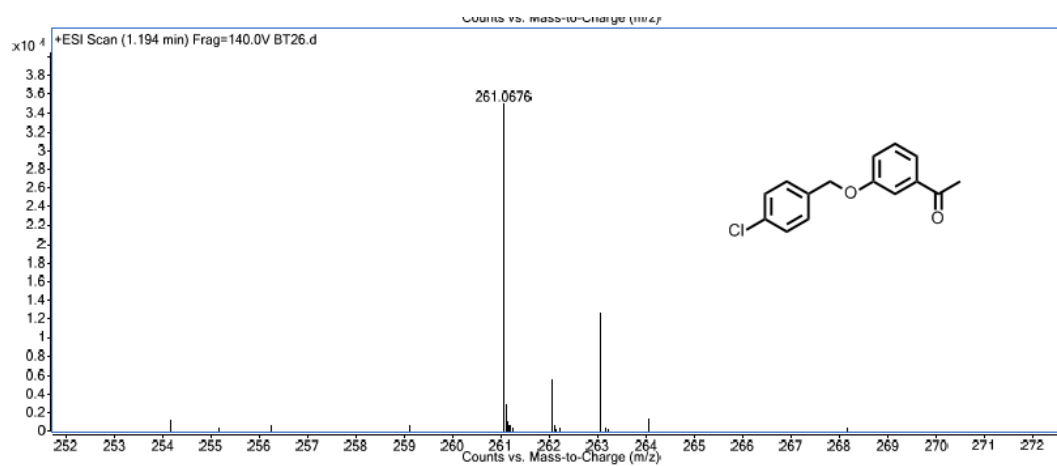

### Elemental Composition Calculator

|                                                  |                                                  |              |               |          |                    |
|--------------------------------------------------|--------------------------------------------------|--------------|---------------|----------|--------------------|
| Target m/z:                                      | 261.0676                                         | Result type: | Positive ions | Species: | [M+H] <sup>+</sup> |
| Elements:                                        | C (0-80); H (0-120); O (0-30); N(0-10); Cl (0-5) |              |               |          |                    |
| Ion Formula                                      | Calculated m/z                                   |              | PPM Error     |          |                    |
| C <sub>15</sub> H <sub>14</sub> ClO <sub>2</sub> | 261.0677                                         |              | 0.5           |          |                    |
